# Supplementary material for: Homology modeling of DFG-in FMS-like tyrosine kinase 3 (FLT3) and structure-based virtual screening for inhibitor identification
Source: PubMed Central journal article supplement (PMC4483777; doi:10.1038/srep11702), 2015-06-29
Supplement: srep11702-s1.pdf [file srep11702-s1.pdf]

## **Supplementary information**

### **Homology modeling of DFG-in FMS-like tyrosine kinase 3 (FLT3) and structure-based virtual screening for inhibitor identification**

Yi-Yu Ke,<sup>†</sup> Vivek Kumar Singh,<sup>‡</sup> Mohane Selvaraj Coumar,<sup>‡</sup> Yung Chang Hsu,<sup>†</sup> Wen-Chieh Wang,<sup>†</sup>

Jen-Shin Song,<sup>†</sup> Chun-Hwa Chen,<sup>†</sup> Wen-Hsing Lin,<sup>†</sup> Szu-Huei Wu,<sup>†</sup> John T. A. Hsu,<sup>†</sup> Chuan Shih,<sup>†</sup> and

Hsing-Pang Hsieh<sup>†,\*</sup>

---

<sup>†</sup> Institute of Biotechnology and Pharmaceutical Research, National Health Research Institutes, 35 Keyan Road, Zhunan, Miaoli County 350, Taiwan, ROC

<sup>‡</sup> Centre for Bioinformatics, School of Life Sciences, Pondicherry University, Kalapet, Puducherry 605014, India

\*To whom correspondence should be addressed: Phone, +886-37-246-166 ext. 35708; fax, +886-37-586-456; e-mail, hphsieh@nhri.org.tw

## Contents

### A. Figures

|                                                                                                         |            |
|---------------------------------------------------------------------------------------------------------|------------|
| <b>Figure S1.</b> Structure alignment of the homology-modeled and DFG-in X-ray structure.....           | <b>S3</b>  |
| <b>Figure S2.</b> Homology model structure validated by ERRAT server.....                               | <b>S4</b>  |
| <b>Figure S3.</b> Homology model structure validated by Profile-3D server.....                          | <b>S4</b>  |
| <b>Figure S4.</b> Homology model structure validated by Ramachandran plot.....                          | <b>S5</b>  |
| <b>Figure S5.</b> Effect of ITD insert and D835 mutation to FLT3 DFG-in modeled structure.....          | <b>S6</b>  |
| <b>Figure S6</b> The IC <sub>50</sub> determination dose-response curve of BPR056 and BPR080.....       | <b>S7</b>  |
| <b>Figure S7</b> Molecular dynamics simulation of DFG-in FLT3 in complex with two hits<br>(H-bond)..... | <b>S7.</b> |
| <b>Figure S8.</b> Aligned structures of the original X-ray ligand and docked ligand.....                | <b>S8</b>  |

### B. Tables

|                                                                                                                                   |            |
|-----------------------------------------------------------------------------------------------------------------------------------|------------|
| <b>Table S1.</b> The percent FLT3 inhibition at 10 $\mu$ M for screened compounds.....                                            | <b>S9</b>  |
| <b>Table S2.</b> Comparison of enrichment factor (EF) of our study with 5 recently reported<br>virtual screening experiments..... | <b>S17</b> |
| <b>Table S3.</b> Docking parameters used for the study.....                                                                       | <b>S18</b> |

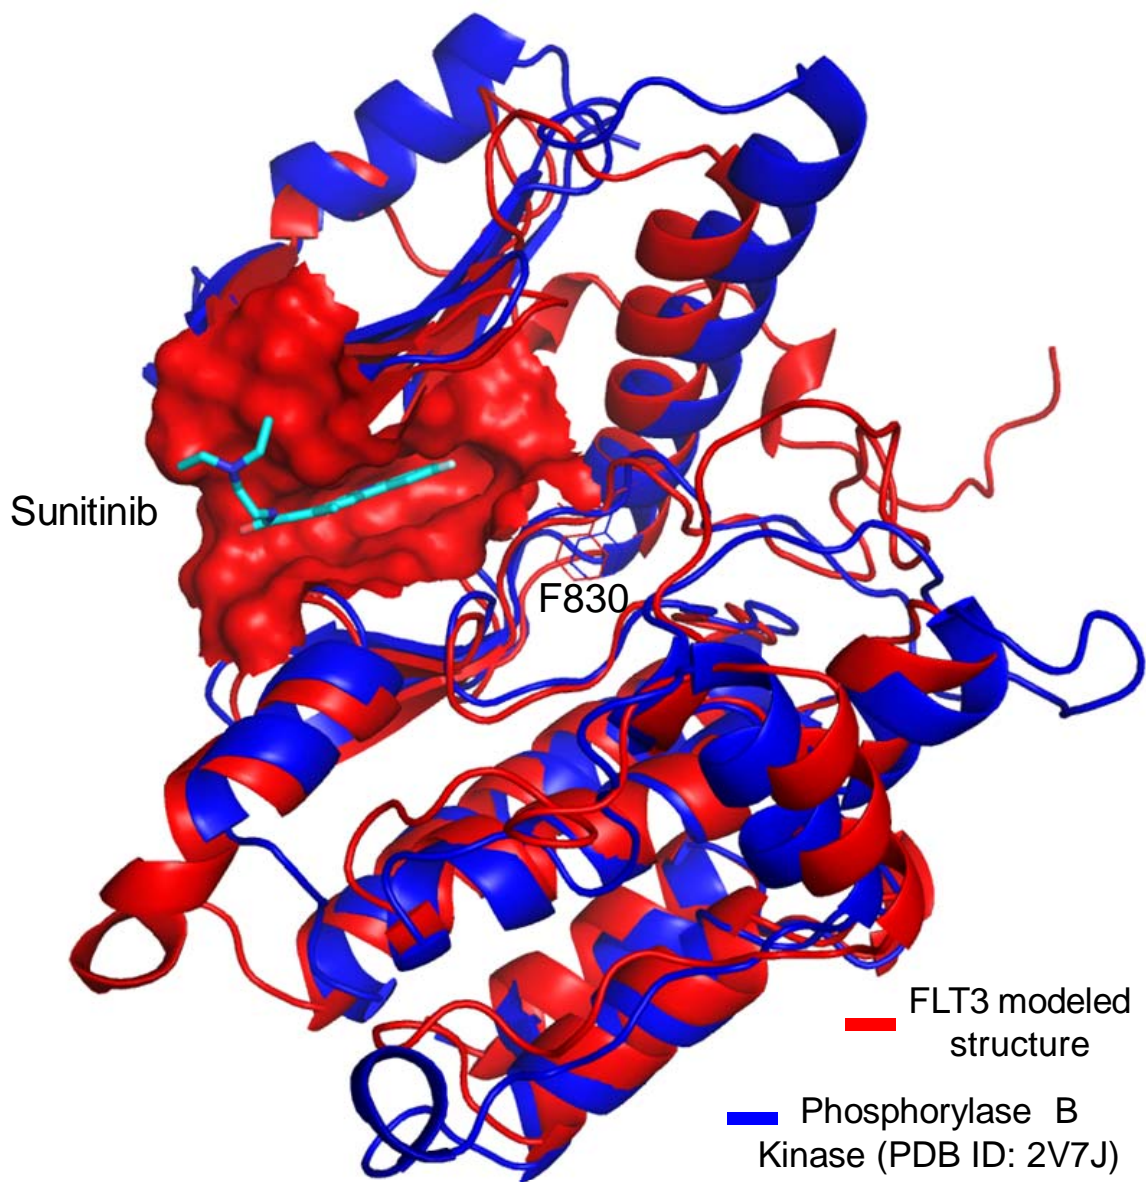

**Figure S1.** 3D structure alignment of the homology-modeled DFG-in FLT3 structure to the X-ray structure of phosphorylase B kinase (PDB ID: 2Y7J) bound to the ligand sunitinib.

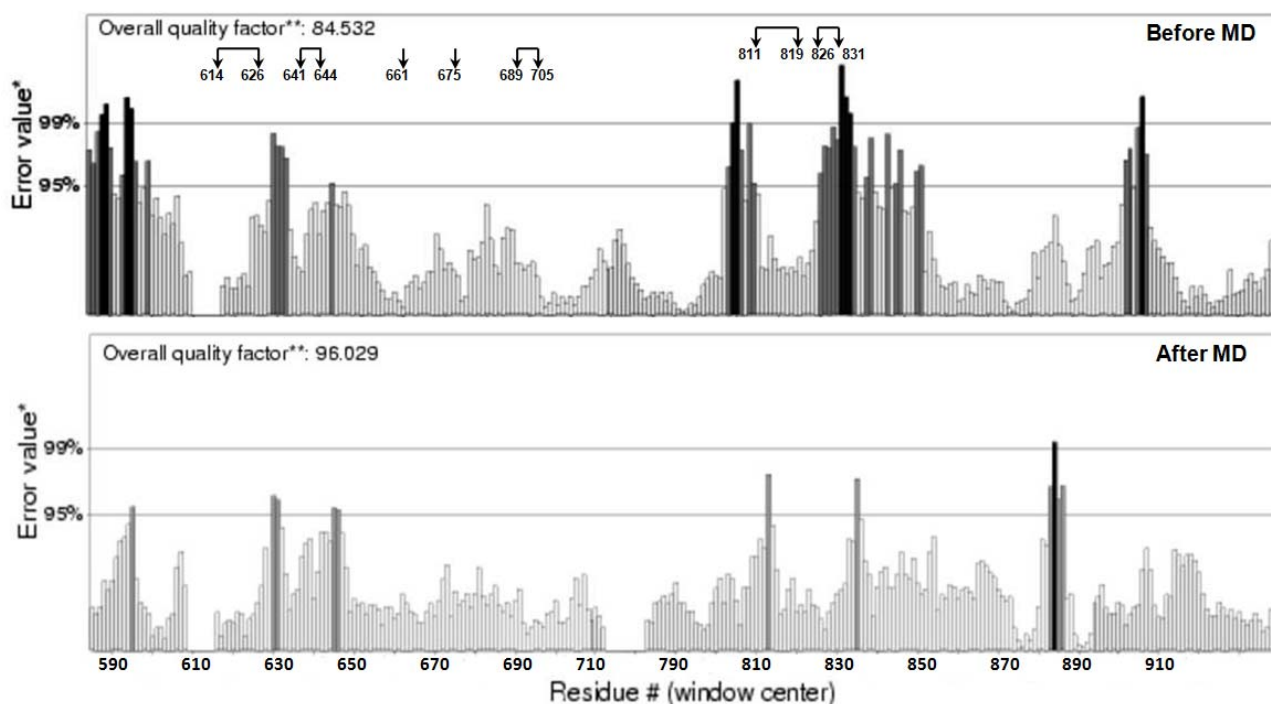

**Figure S2.** Assessment of the DFG-in FLT3-modeled structure by ERRAT server. The arrows represent the active site residues in the protein model. The overall quality factor of the modeled structure improved after MD simulation.

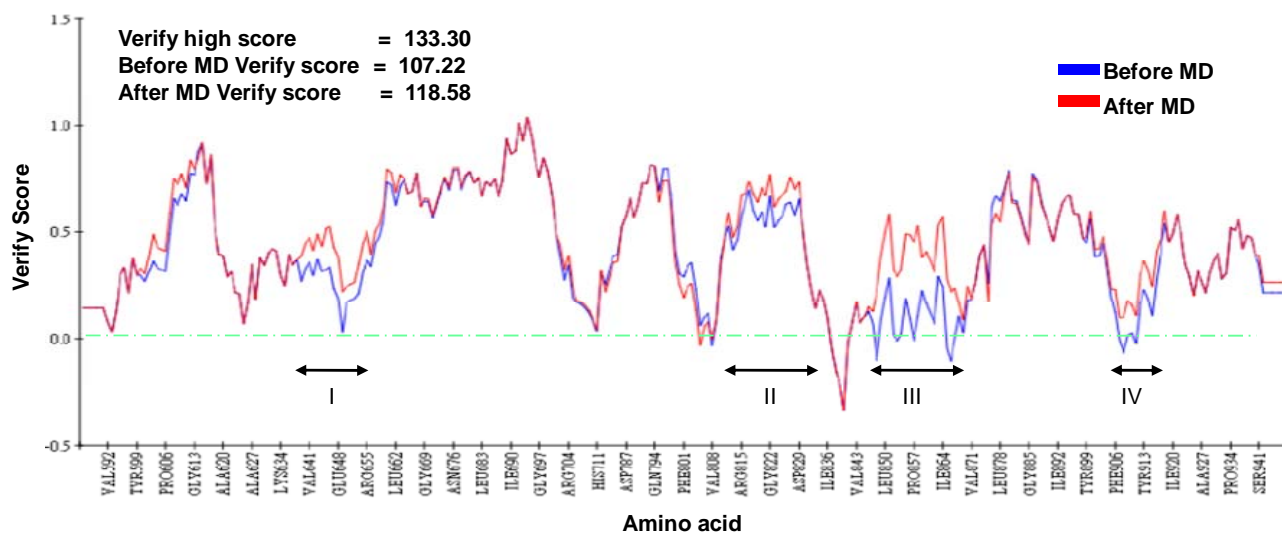

**Figure S3.** Assessment of the DFG-in FLT3-modeled structure by Profile-3D server. The arrowed regions represent the active site residues in the protein model. The Verify score improved after MD simulation of the modeled structure.

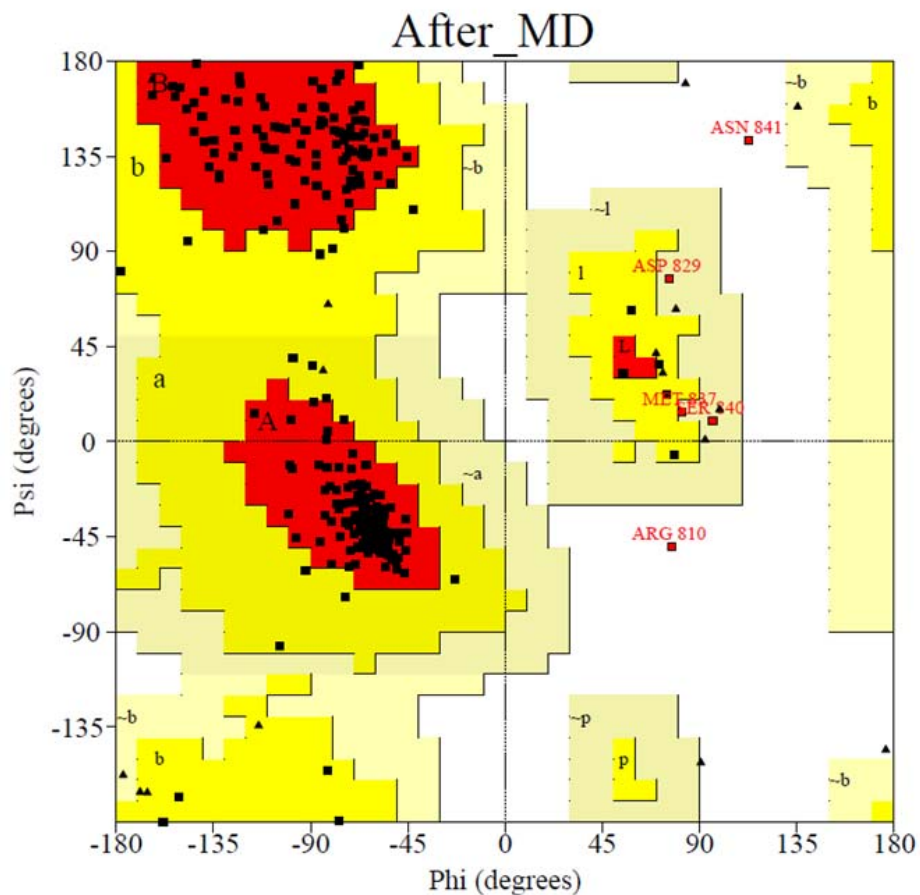

Plot statistics

|                                                      |     |        |
|------------------------------------------------------|-----|--------|
| Residues in most favoured regions [A,B,L]            | 235 | 90.0%  |
| Residues in additional allowed regions [a,b,l,p]     | 21  | 8.0%   |
| Residues in generously allowed regions [~a,~b,~l,~p] | 3   | 1.1%   |
| Residues in disallowed regions                       | 2   | 0.8%   |
| -----                                                |     |        |
| Number of non-glycine and non-proline residues       | 261 | 100.0% |
| Number of end-residues (excl. Gly and Pro)           | 2   |        |
| Number of glycine residues (shown as triangles)      | 20  |        |
| Number of proline residues                           | 10  |        |
| -----                                                |     |        |
| Total number of residues                             | 293 |        |

Based on an analysis of 118 structures of resolution of at least 2.0 Angstroms and R-factor no greater than 20%, a good quality model would be expected to have over 90% in the most favoured regions.

**Figure S4.** Ramachandran plot of the homology modeled DFG-in FLT3 structure after MD simulation.

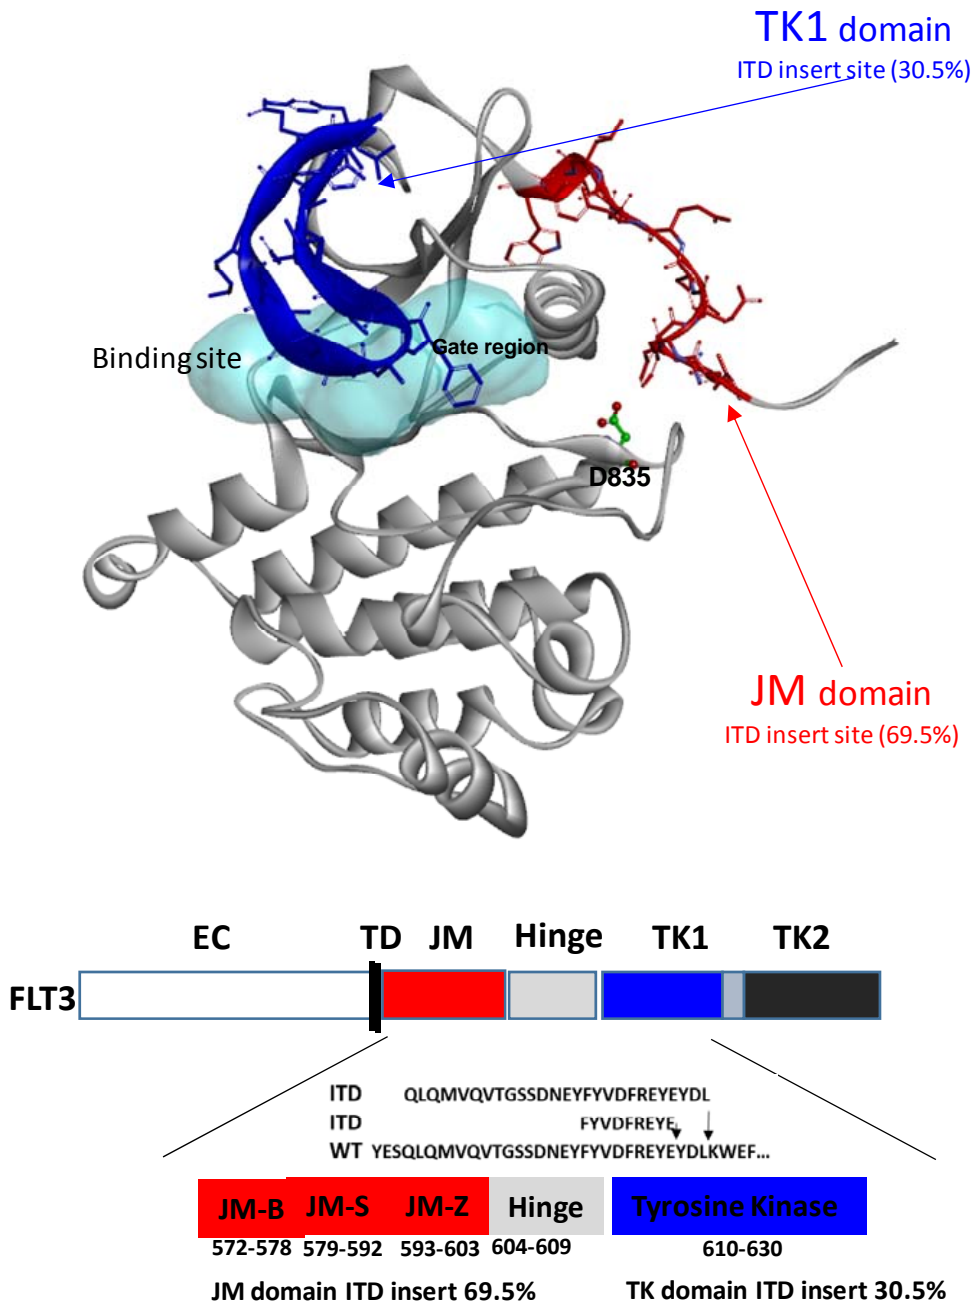

**Figure S5.** FLT3 (DFG-in) ITD insert site and D835 mutation location. Tyrosine kinase domain-1 (TK1, blue color); juxtamembranne domain (JM, red color) and ligand binding site (blue transparent surface).

| FLT3 kinase assay     |             | 2013/5/27   | Z=            | 0.69      |
|-----------------------|-------------|-------------|---------------|-----------|
|                       |             | windows=    | 5.4           |           |
| $\mu\text{M}$         | CSV0A027968 | CSV0A034160 | $\mu\text{M}$ | sorafenib |
| 30                    | 61.8%       | 77.5%       | 2             | 92.3%     |
| 20                    | 67.2%       | 98.8%       | 0.8           | 103.8%    |
| 15                    | 60.4%       | 108.2%      | 0.32          | 82.7%     |
| 10                    | 42.4%       | 79.9%       | 0.128         | 60.0%     |
| 5                     | 18.3%       | 66.2%       | 0.051         | 33.5%     |
| 2.5                   | 9.3%        | 47.9%       | 0.020         | 24.3%     |
| 1.25                  | 1.4%        | 24.7%       | 0.008         | 10.1%     |
| 0.625                 | 0.4%        | 16.5%       | 0.003         | 8.4%      |
| IC50( $\mu\text{M}$ ) | 10.7        | 2.3         |               | 0.102     |

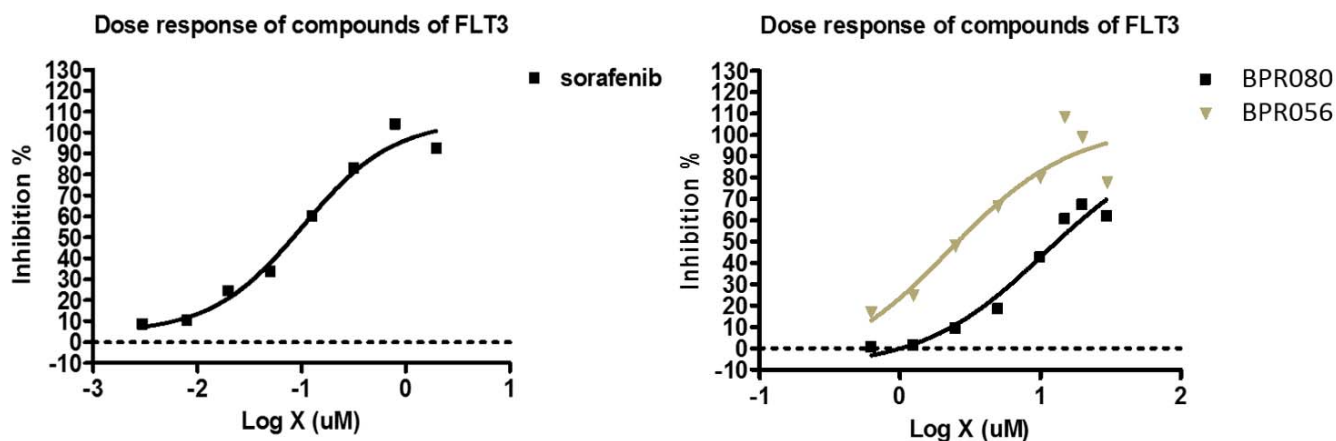

**Figure S6.** The IC<sub>50</sub> determination dose-reponse curve of BPR056 and BPR080, along with sorafenib.

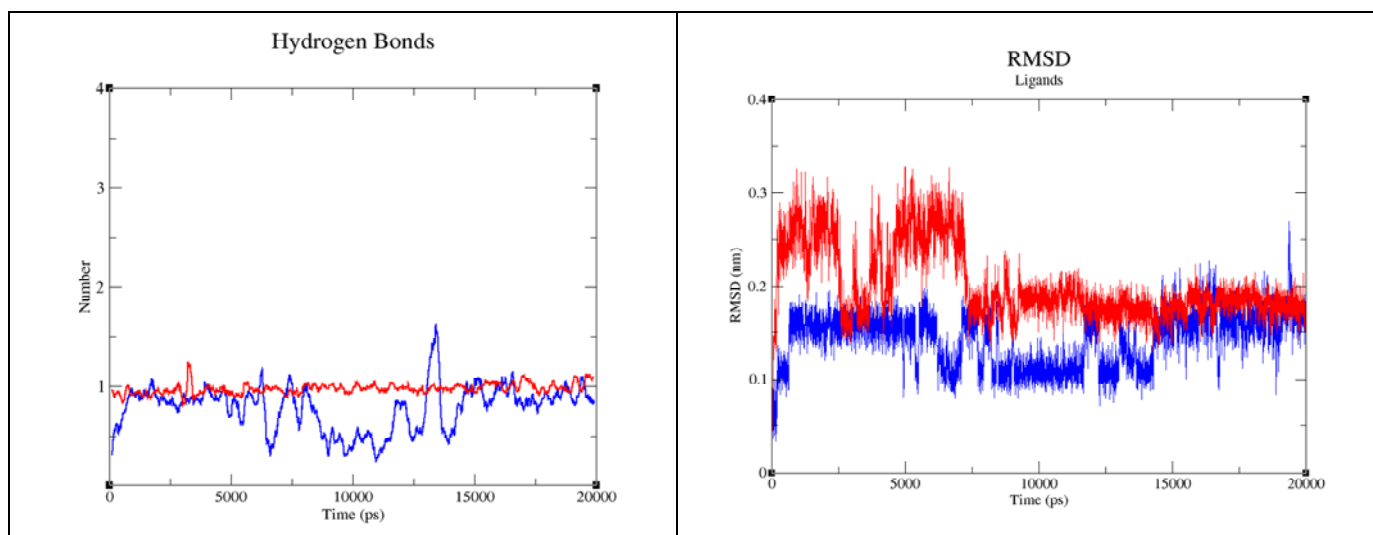

**Figure S7.** Molecular dynamics simulation (20 ns) of DFG-in FLT3 in complex with two hits identified from VS. (A) H-bond graph for BPR056 (blue) and BPR080 (red). (B) Ligand root mean square deviation (RMSD) graph for BPR056 (blue) and BPR080 (red).

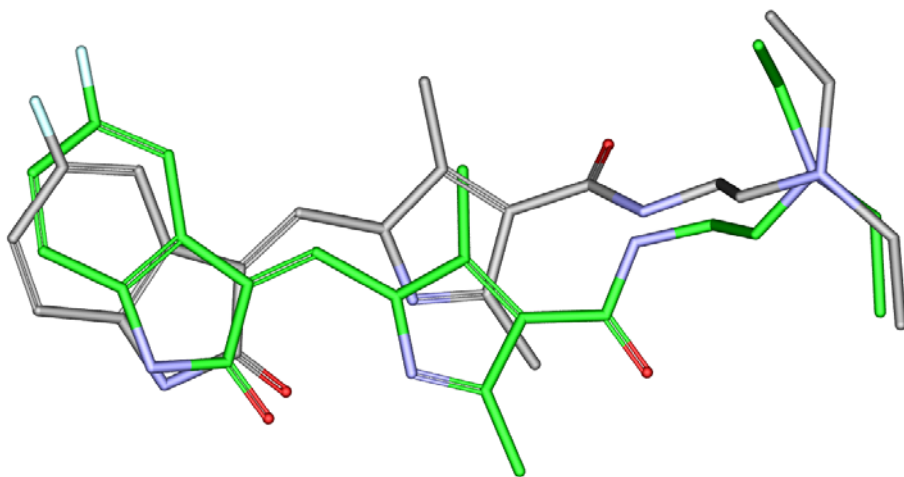

**Figure S8.** Aligned structures of the original ligand conformation (green) present in 2Y7J and the docked ligand conformation (gray) of sunitinib in 2Y7J crystal structure. RMSD = 1.50Å, calculation done using Discovery studio 2.1.



**Table S1.** The top 97 compounds ranked by DOCK6.0/LigFit score and thier percent FLT3 inhibition at 10 $\mu$ M.

| Corporate ID        | MW      | Dock /<br>Ligfit score | Inhibition % | Corporate ID        | MW      | Dock/<br>Ligfit Score | Inhibition % |
|---------------------|---------|------------------------|--------------|---------------------|---------|-----------------------|--------------|
| BPR001(CSV0A031467) | 500.559 | -372/110               | -0.90%       | BPR050(CSV0A062560) | 500.471 | -356/104              | 0.40%        |
| BPR002(CSV0A011296) | 485.46  | -369/107               | 1.70%        | BPR051(CSV0C001836) | 521.368 | -356/96               | 0.90%        |
| BPR003(CSV0A042562) | 501.584 | -369/101               | 0.50%        | BPR052(CSV0C008541) | 523.596 | -356/109              | 6.00%        |
| BPR004(CSV0A048785) | 533.501 | -369/108               | 0.80%        | BPR053(CSV0A008714) | 532.745 | -355/108              | -2.20%       |
| BPR005(CSV0A013828) | 523.431 | -368/108               | -2.50%       | BPR054(CSV0A013730) | 541.58  | -355/105              | -0.20%       |
| BPR006(CSV0A014367) | 481.637 | -368/100               | -2.70%       | BPR055(CSV0A031501) | 462.574 | -355/100              | -1.00%       |

|                     |                                                                                     |         |          |       |                            |                                                                                       |               |          |               |
|---------------------|-------------------------------------------------------------------------------------|---------|----------|-------|----------------------------|---------------------------------------------------------------------------------------|---------------|----------|---------------|
| BPR007(CSV0A051509) | 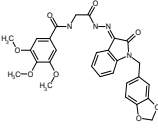   | 546.541 | -368/108 | 2.80% | <b>BPR056(CSV0A034160)</b> |    | <b>325.33</b> | -355/91  | <b>82.10%</b> |
| BPR008(CSV0A005771) |    | 486.575 | -367/98  | 0.10% | BPR057(CSV0A034206)        |    | 533.545       | -355/106 | 0.90%         |
| BPR009(CSV0A035490) |    | 525.628 | -367/102 | 6.60% | BPR058(CSV0A034595)        |    | 486.532       | -355/103 | 2.60%         |
| BPR010(CSV0A038176) |    | 464.435 | -367/101 | 2.50% | BPR059(CSV0A043513)        |    | 486.454       | -355/104 | 0.80%         |
| BPR011(CSV0A029882) |    | 545.641 | -366/107 | 7.60% | BPR060(CSV0A051510)        |    | 514.498       | -355/107 | 0.90%         |
| BPR012(CSV0A041534) |   | 501.376 | -366/104 | 2.10% | BPR061(CSV0A059600)        |   | 479.477       | -355/102 | 4.90%         |
| BPR013(CSV0A008382) |  | 469.504 | -365/103 | 0.00% | BPR062(CSV0A061707)        |  | 456.508       | -355/108 | 0.80%         |

|                     |                                                                                     |         |          |        |                     |                                                                                       |         |          |        |
|---------------------|-------------------------------------------------------------------------------------|---------|----------|--------|---------------------|---------------------------------------------------------------------------------------|---------|----------|--------|
| BPR014(CSV0A017765) | 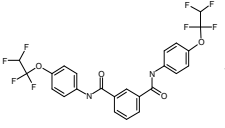   | 548.393 | -365/102 | 0.70%  | BPR063(CSV0C002699) |    | 435.486 | -355/101 | 0.30%  |
| BPR015(CSV0A041988) |    | 545.624 | -365/112 | -0.40% | BPR064(CSV0A028575) |    | 542.577 | -354/111 | 2.00%  |
| BPR016(CSV0A016908) |    | 490.541 | -364/103 | 0.50%  | BPR065(CSV0A034602) |    | 482.543 | -354/108 | 1.10%  |
| BPR017(CSV0A021846) |    | 473.448 | -363/112 | 1.50%  | BPR066(CSV0A010719) |    | 529.99  | -353/105 | 0.10%  |
| BPR018(CSV0A052457) |    | 536.595 | -363/111 | 3.50%  | BPR067(CSV0A012867) |    | 501.376 | -353/103 | 2.00%  |
| BPR019(CSV0A062557) |   | 486.488 | -363/104 | 1.30%  | BPR068(CSV0A019739) |   | 534.373 | -353/106 | -1.50% |
| BPR020(CSV0B012531) |  | 492.957 | -363/94  | 0.70%  | BPR069(CSV0A034333) |  | 454.879 | -353/99  | 1.60%  |

|                     |                                                                                     |         |          |        |                     |                                                                                       |         |          |       |
|---------------------|-------------------------------------------------------------------------------------|---------|----------|--------|---------------------|---------------------------------------------------------------------------------------|---------|----------|-------|
| BPR021(CSV0A005350) | 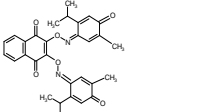   | 512.57  | -362/100 | 13.20% | BPR070(CSV0A048895) |    | 500.905 | -353/103 | 2.30% |
| BPR022(CSV0A034868) |    | 508.99  | -362/98  | -2.20% | BPR071(CSV0A061227) |    | 522.013 | -353/111 | 1.40% |
| BPR023(CSV0A019616) |    | 538.564 | -361/113 | 0.90%  | BPR072(CSV0A004079) |    | 457.449 | -352/101 | 0.70% |
| BPR024(CSV0A024759) |    | 535.567 | -361/114 | 0.60%  | BPR073(CSV0A026290) |    | 479.883 | -352/103 | 0.10% |
| BPR025(CSV0A032833) |    | 476.545 | -361/111 | 0.50%  | BPR074(CSV0A030936) |    | 500.474 | -352/109 | 0.20% |
| BPR026(CSV0A034205) |   | 519.518 | -361/107 | 1.50%  | BPR075(CSV0A045095) |   | 540.624 | -352/111 | 1.30% |
| BPR027(CSV0C001841) |  | 504.473 | -361/103 | -0.20% | BPR076(CSV0A053019) |  | 543.646 | -352/118 | 1.10% |

|                     |                                                                                     |         |          |        |                            |                                                                                       |                |          |               |
|---------------------|-------------------------------------------------------------------------------------|---------|----------|--------|----------------------------|---------------------------------------------------------------------------------------|----------------|----------|---------------|
| BPR028(CSV0A009104) | 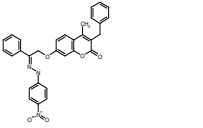   | 519.562 | -360/109 | -0.60% | BPR077(CSV0A055635)        |    | 468.56         | -352/112 | 4.80%         |
| BPR029(CSV0A043963) |    | 508.516 | -360/101 | 0.90%  | BPR078(CSV0A043498)        |    | 538.421        | -351/116 | 1.30%         |
| BPR030(CSV0B003578) |    | 494.551 | -360/102 | 0.30%  | BPR079(CSV0A015737)        |    | 524.375        | -350/97  | 0.70%         |
| BPR031(CSV0B028719) |    | 436.446 | -360/92  | 1.70%  | <b>BPR080(CSV0A027968)</b> |    | <b>479.512</b> | -350/105 | <b>41.60%</b> |
| BPR032(CSV0C002695) |    | 531.619 | -360/117 | 2.50%  | BPR081(CSV0A034159)        |    | 390.4          | -350/89  | 22.80%        |
| BPR033(CSV0C002703) |   | 544.409 | -360/96  | 3.10%  | BPR082(CSV0A034596)        |   | 516.558        | -350/104 | 1.00%         |
| BPR034(CSV0C012196) |  | 506.604 | -360/105 | 0.90%  | BPR083(CSV0A034609)        |  | 482.587        | -350/104 | 3.00%         |

|                     |                                                                                     |         |          |       |                     |                                                                                       |         |          |        |
|---------------------|-------------------------------------------------------------------------------------|---------|----------|-------|---------------------|---------------------------------------------------------------------------------------|---------|----------|--------|
| BPR035(CSV0A038787) | 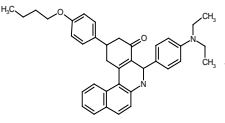   | 544.743 | -359/114 | 1.50% | BPR084(CSV0A043957) |     | 456.889 | -350/96  | 2.90%  |
| BPR036(CSV0A053548) |    | 538.605 | -359/114 | 4.20% | BPR085(CSV0A056184) |    | 500.575 | -350/106 | 1.00%  |
| BPR037(CSV0A062559) |    | 516.514 | -359/114 | 4.90% | BPR086(CSV0A058884) |    | 525.571 | -350/108 | 0.90%  |
| BPR038(CSV0A029878) |    | 507.871 | -358/98  | 1.70% | BPR087(CSV0A000015) |    | 508.71  | -349/101 | -0.60% |
| BPR039(CSV0A043865) |    | 517.425 | -358/99  | 1.70% | BPR088(CSV0A019152) |    | 544.664 | -349/118 | 0.10%  |
| BPR040(CSV0A059009) |   | 464.482 | -358/102 | 2.40% | BPR089(CSV0A024460) |   | 515.533 | -349/104 | 0.90%  |
| BPR041(CSV0A022916) |  | 526.51  | -357/104 | 0.70% | BPR090(CSV0A028568) |  | 515.598 | -349/111 | -0.20% |

|                     |                                                                                     |         |          |        |                     |                                                                                       |         |          |       |
|---------------------|-------------------------------------------------------------------------------------|---------|----------|--------|---------------------|---------------------------------------------------------------------------------------|---------|----------|-------|
| BPR042(CSV0A030020) | 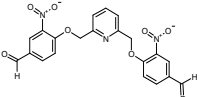    | 437.369 | -357/101 | -0.60% | BPR091(CSV0A034045) |    | 503.606 | -349/110 | 0.30% |
| BPR043(CSV0A031741) |    | 547.526 | -357/119 | 0.60%  | BPR092(CSV0A036372) |    | 500.474 | -349/109 | 0.40% |
| BPR044(CSV0A036448) |    | 473.448 | -357/113 | 2.40%  | BPR093(CSV0A039930) |    | 485.503 | -349/105 | 1.10% |
| BPR045(CSV0A048961) |    | 535.56  | -357/116 | 3.50%  | BPR094(CSV0A051514) |    | 500.515 | -349/109 | 2.20% |
| BPR046(CSV0A051508) |    | 486.488 | -357/105 | 2.90%  | BPR095(CSV0C002702) |    | 465.513 | -349/97  | 0.20% |
| BPR047(CSV0B026256) |   | 463.48  | -357/97  | -0.70% | BPR096(CSV0C002898) |   | 471.602 | -349/97  | 0.40% |
| BPR048(CSV0C008368) |  | 482.503 | -357/110 | 10.90% | BPR097(CSV0C014232) |  | 539.636 | -349/102 | 3.10% |

|                               |                                                                   |                            |          |                              |           |                                                         |         |                                            |
|-------------------------------|-------------------------------------------------------------------|----------------------------|----------|------------------------------|-----------|---------------------------------------------------------|---------|--------------------------------------------|
| BPR049(CSV0A000009)           | <chem>COC1=CC(OC)=C(OC)C=C1C(=O)N(C(=O)O)C2=CC3=CC=CC=C3O2</chem> | 458.428                    | -356/102 | 0.10%                        | Sunitinib | <chem>CCN(CC)CC(=O)Nc1c(C)c2c(c1)nc3c2c(F)ccc3=O</chem> | 398.484 | -300/89                                    |
| <b>Assay control compound</b> |                                                                   | <b>2 <math>\mu</math>M</b> |          | <b>0.1 <math>\mu</math>M</b> |           |                                                         |         | <b>IC<sub>50</sub> (<math>\mu</math>M)</b> |
| Sorafenib                     |                                                                   | 82.10%                     |          | 45.20%                       |           |                                                         |         | 0.102                                      |



**Table S2.** Comparison of enrichment factor (EF) of our study with 5 recently reported virtual screening experiments

| Comparison                                                                                                                        | Our model                                | J Chem Inf Model.<br>2011, (51): 755.    | J Chem Inf Model.<br>2013 (53),809  | ChemMedChem.<br>2014, (9): 953. | J Mol Graph Model.<br>2014, (53): 31 | Bioorg Med Chem<br>Lett. 2014 (5): 1261. |
|-----------------------------------------------------------------------------------------------------------------------------------|------------------------------------------|------------------------------------------|-------------------------------------|---------------------------------|--------------------------------------|------------------------------------------|
| Screen method                                                                                                                     | Homology<br>model+Structure-b<br>ased VS | Homology<br>model+Structure-bas<br>ed VS | Ligand-based+Struct<br>ure-based VS | Ligand-based VS                 | Ligand-based VS                      | Structure-based VS                       |
| Total number of active molecules identified (hits identified)                                                                     | 2                                        | 3                                        | 1                                   | 7                               | 5                                    | 2                                        |
| Total number of molecules selected (no. selected)                                                                                 | 97                                       | 25                                       | 24                                  | 151                             | 357                                  | 50                                       |
| Total number of active molecules (hits total)                                                                                     | 2                                        | 3                                        | 1                                   | 7                               | 5                                    | 2                                        |
| Total number of molecules in database (no. Total)                                                                                 | 125000                                   | 1125                                     | 77931                               | 125000                          | 200000                               | 4000                                     |
| Hit IC <sub>50</sub> range                                                                                                        | 2.3-10.7 $\mu$ M                         | 2-58 $\mu$ M                             | 14.4 $\mu$ M                        | 1.29-11.71 $\mu$ M              | 0.83-1.12 $\mu$ M                    | 4.05-5.54 $\mu$ M                        |
| Hit rate <sup>a</sup>                                                                                                             | 2.06                                     | 12                                       | 4.7                                 | 4.64                            | 1.40                                 | 4                                        |
| Enrichment factor (EF) <sup>b</sup>                                                                                               | 1288.66                                  | 45.00                                    | 3247.13                             | 827.81                          | 560.22                               | 80.00                                    |
| <sup>a</sup> Hit rate =(hits identified /no. selected); <sup>b</sup> EF = (hits identified /no. selected)/ (hits total/no. total) |                                          |                                          |                                     |                                 |                                      |                                          |

**Table S3:** Docking parameters used for the study

| <b>Docking parameters</b>     |      |                                 |     |
|-------------------------------|------|---------------------------------|-----|
| calculate_rmsd                | yes  | minimize_ligand                 | yes |
| use_rmsd_reference_mol        | yes  | minimize_anchor                 | yes |
| orient_ligand                 | yes  | minimize_flexible_growth        | yes |
| automated_matching            | yes  | use_advanced_simplex_parameters | yes |
| max_orientations              | 3333 | simplex_anchor_max_iterations   | 10  |
| critical_points               | yes  | simplex_anchor_max_cycles       | 1   |
| chemical_matching             | yes  | simplex_anchor_score_converge   | 0.1 |
| use_ligand_spheres            | no   | simplex_anchor_cycle_converge   | 0.1 |
| flexible_ligand               | yes  | simplex_anchor_trans_step       | 0.1 |
| min_anchor_size               | 50   | simplex_anchor_rot_step         | 0.1 |
| pruning_use_clustering        | yes  | simplex_anchor_tors_step        | 10  |
| pruning_max_orients           | 10   | simplex_grow_max_iterations     | 10  |
| pruning_clustering_cutoff     | 10   | simplex_grow_max_cycles         | 3   |
| use_internal_energy           | yes  | simplex_grow_score_converge     | 0.1 |
| internal_energy_att_exp       | 6    | simplex_grow_cycle_converge     | 1   |
| internal_energy_rep_exp       | 12   | simplex_grow_trans_step         | 1   |
| internal_energy_dielectric    | 4    | simplex_grow_rot_step           | 0.1 |
| use_clash_overlap             | yes  | simplex_grow_tors_step          | 50  |
| clash_overlap                 | 0.3  | simplex_final_min               | yes |
| bump_filter                   | yes  | simplex_final_min_rep_rad_scale | 1   |
| max_bumps_anchor              | 12   | simplex_final_min_add_internal  | yes |
| max_bumps_growth              | 8    | simplex_final_max_iterations    | 40  |
| score_molecules               | yes  | simplex_final_max_cycles        | 1   |
| contact_score_primary         | yes  | simplex_final_score_converge    | 0.1 |
| contact_score_secondary       | no   | simplex_final_cycle_converge    | 1   |
| contact_score_cutoff_distance | 4.5  | simplex_final_trans_step        | 1   |
| contact_score_clash_overlap   | 0.5  | simplex_final_rot_step          | 0.1 |
| contact_score_clash_penalty   | 10   | simplex_final_tors_step         | 50  |
| grid_score_secondary          | yes  | simplex_secondary_minimize_pose | no  |
| grid_score_rep_rad_scale      | 1    | simplex_random_seed             | 0   |
| grid_score_vdw_scale          | 1    | atom_model                      | all |
| grid_score_es_scale           | 1    |                                 |     |
